# Supplementary material for: Higher knee flexion moment during walking is associated with a lower risk of knee pain developing among the elderly after 24 months
Source: PubMed Central journal article supplement — Eur J Phys Rehabil Med. 2023 May 17;59(3):386–95. doi: 10.23736/S1973-9087.23.07798-5 (PMC10267857; doi:10.23736/s1973-9087.23.07798-5), 2023-05-17
Supplement: Supplementary_Digital_Material1.pdf [file Supplementary_Digital_Material1.pdf]

SUPPLEMENTARY DIGITAL MATERIAL 1

Supplementary Figure 1.—Relationships between knee moments and (A and C) the intensity of knee pain and (B and D) days with knee pain among knees developed NRS pain in 12 months, adjusted by age, sex, body height, comorbidities, activity level, and walking speed.

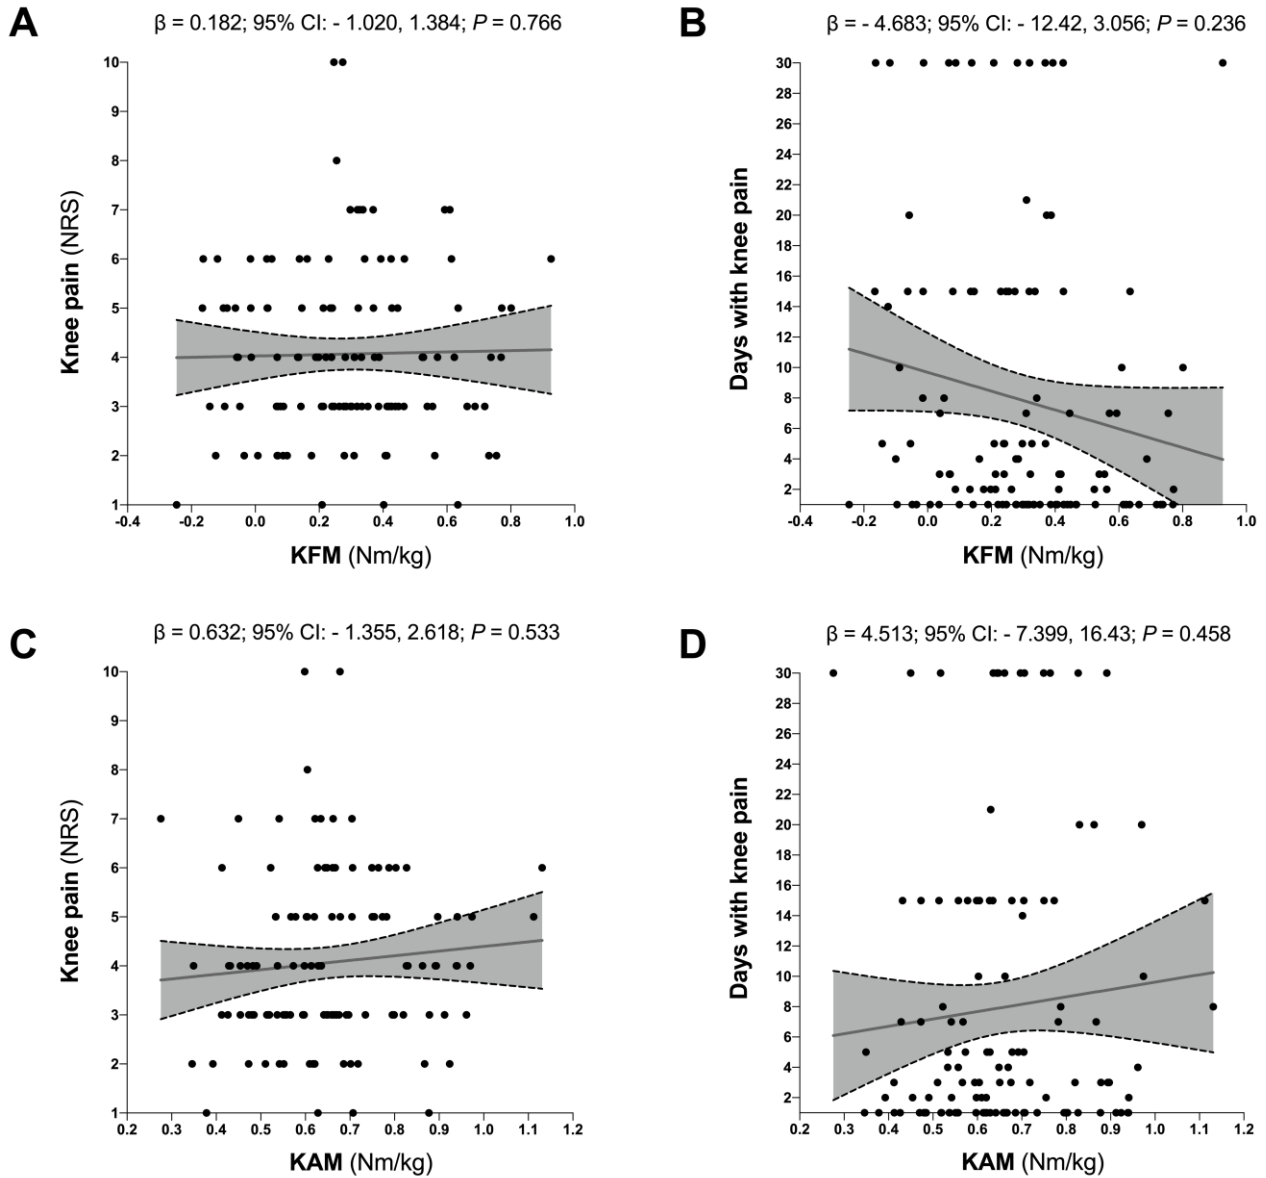

KFM: peak knee flexion moment; KAM: peak knee adduction moment; NRS: Numeric Rating Scale.  $\beta$ : adjusted regression coefficients; 95% CI: 95% confidence interval of  $\beta$ .
